# Supplementary material for: A new method to amplify colorimetric signals of paper-based nanobiosensors for simple and sensitive pancreatic cancer biomarker detection
Source: Royal Society of Chemistry journal article supplement (doi:10.1039/d0an00704h), 2020-01-01
Supplement: d0an00704h1.pdf [file d0an00704h1.pdf]

## Supporting information

### **New method to amplify colorimetric signals of paper-based nanobiosensors for simple and sensitive pancreatic cancer biomarker detection**

K.Sudhakara Prasad,<sup>1,a</sup> Yousef Abugalyon,<sup>1</sup> Chunqiang Li,<sup>2</sup> Feng Xu,<sup>3</sup> and XiuJun Li<sup>1,4\*</sup>

<sup>1</sup>*Department of Chemistry, University of Texas at El Paso, 500 West University Avenue, El Paso, Texas, 79968, USA. Fax: +1-915-747-5748; Tel: +1-915-747-8967;*

<sup>2</sup>*Department of Physics, Border Biomedical Research Center, University of Texas at El Paso, 500 West University Avenue, El Paso, Texas, 79968, USA.*

<sup>3</sup>*Bioinspired Engineering & Biomechanics Center (BEBC), Xi'an Jiaotong University, Shaanxi, P. R. China*

<sup>4</sup>*Biomedical Engineering, Border Biomedical Research Center, and Environmental Science & Engineering, University of Texas at El Paso, USA.*

<sup>a</sup>*Current affiliation: Yenepoya Research Centre, Yenepoya University, Mangalore-575018, Karnataka, India*

*Corresponding Author: XiuJun Li; E-mail: [xli4@utep.edu](mailto:xli4@utep.edu)*

## **Materials and Chemicals**

SU-8 was obtained from MicroChem, while PEAK 1 recombinant protein and Anti PEAK1 were obtained from MyBiosource Inc. Whatman #1 Chromatography paper, AuNPs with 20 nm diameters, hydroxy naphthol blue, phosphate-buffered saline, NaBH<sub>4</sub>, and bovine serum albumin were purchased from Sigma and used as received. All of the solutions were prepared with ultrapure Milli-Q water (18.2 M Ω cm) from a Millipore Milli-Q system.

## **Preparation of AuNPs-tagged Anti PEAK1 Bioprobes**

Bioconjugation of AuNPs to Anti PEAK1 was carried out through a simple physisorption method. Briefly, AuNPs-tagged Anti PEAK1 were synthesized by adding 10 μL of 20 μg/mL Anti PEAK1 solution in 0.01 M phosphate-buffered saline (PBS, pH 7.2) to 100 μL of 20 nm diameter AuNPs solution in PBS, followed by gentle mixing at 4 °C for 12 h. After mixing and centrifugation, the obtained AuNPs-tagged Anti PEAK1 was incubated with 0.5% bovine serum albumin (BSA) to block any possible remaining active sites to avoid any non-specific absorption. The prepared AuNPs-tagged Anti PEAK1 bioprobes were stored at 4 °C until use.

## **Data Analysis**

Once an image of the paper-based detection zones was captured, average brightness of each detection zone was measured using the ImageJ software, distributed for free by NIH (<http://rsb.info.nih.gov/ij/download.html>). RGB images can be converted to the gray scale using the formula  $\text{gray} = (\text{red} + \text{green} + \text{blue}) / 3$ . The display range in ImageJ from minimum to maximum is scaled from 0 to 255 (8-bit). The brighter, the higher gray value is.

Figure S1.

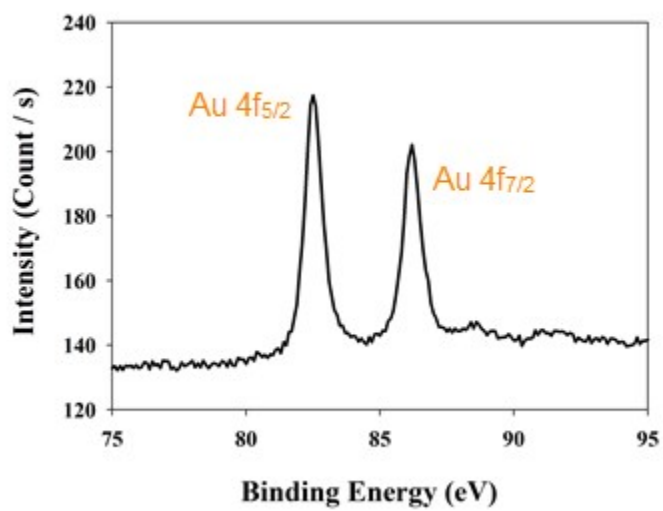

**Figure S1.** Deconvoluted Au 4f XPS spectra for the immunosensor.
